# Supplementary material
Source: publisher figshare collection journal article supplement (https://sage.figshare.com/ndownloader/files/11501138)
Supplement: Supplementary file 1 [file 11501138]

## Supplemental Analyses

### Unbiased Hit Rates

Age group (6-7 year olds, 8-9 year olds, 10-11 year olds, and adults) was the between-groups variable, while the emotion of the stimulus (happy, sad, angry, and scared) and type of stimulus (music, inflected speech, and affect bursts) were within-groups variables. The DV was participant's recognition of the emotion in the stimulus using unbiased hit rates.

A main effect of age group was found,  $F(3, 107) = 27.32, p < .001, \eta^2_p = .43$ . Bonferroni-corrected post hoc tests revealed that adults ( $M = .84$ ) were more accurate than all children,  $ps \leq .015$ . The two older groups of children (10-11 year olds,  $M = .73$ , 8-9 year olds,  $M = .63$ ) scored similarly,  $p = .083$ , and 6-7 year olds ( $M = .58$ ) scored similarly to 8-9 year olds,  $p = 1.00$ , however were less accurate than 10-11 year olds,  $p = .002$ .

A main effect of the type of stimulus was found,  $F(1.99, 213.7) = 11.30, p < .001, \eta^2_p = .96$ . As predicted, there was no significant difference between scores on music ( $M = .71$ ) and speech ( $M = .71$ ),  $p = 1.0$ . In contrast, scores on affect bursts ( $M = .74$ ) were significantly higher than both music and speech,  $ps < .001$ .

The age by type interaction,  $F(5.99, 213.7) = 3.01, p = .04, \eta^2_p = .06$ , indicated that for music stimuli, 6-7 year olds ( $M = .51$ ) and 8-9 year olds ( $M = .56$ ), 8-9 year olds and 10-11 year olds, and 10-11 year olds ( $M = .74$ ) and adults ( $M = .84$ ) scored similarly,  $ps \geq .22$ . Both 10-11 year olds and adults scored higher than the youngest group,  $ps \leq .002$ , and adults scored higher than 8-9 year olds,  $p \leq .008$ . For the inflected speech stimuli, 6-7 year olds ( $M = .53$ ) scored similarly to 8-9 year olds ( $M = .60$ ),  $p = 1.00$ . 10-11 year olds ( $M = .69$ ) scored similarly to all groups,  $ps \geq .09$ . Adults ( $M = .84$ ) scored higher on speech than the 2 younger groups of children,  $ps \leq .001$ . Finally, for the affect bursts, all age groups scored similarly,  $ps \geq .108$ , with

the exception of adults, who scored higher than the 6-7 year olds ( $p = .03$ ). Table 4 summarises these results.

The age by type interaction also revealed that for 6-7 year olds, scores on music ( $M = .51$ ) and speech ( $M = .53$ ) were similar,  $p = 1.0$ , while scores on affect bursts ( $M = .69$ ) were significantly higher than scores on music,  $p = .015$ . Scores on speech were similar to music and affect bursts ( $ps > .08$ ). For children aged 8-9 years, 10-11 years, and adults, there was no difference between scores on the 3 types of stimuli,  $ps \geq .108$ .

A main effect of the emotion of the stimulus was also found,  $F(2.69, 288.71) = 11.75$ ,  $p < .001$ ,  $\eta^2_p = .10$ . Participants' scores for happy and sad stimuli ( $Ms = .78$ ,) were similar ( $p = 1.00$ ), and were higher than the other emotions,  $ps < .001$ . Scores on anger ( $M = .69$ ) and fear ( $M = .69$ ) were also similar,  $p = 1.00$ .

Finally, a significant stimulus type by emotion interaction was found,  $F(4.87, 521.15) = 8.82$ ,  $p < .001$ ,  $\eta^2_p = .076$ . For the music stimuli, participants scored similarly for happy ( $M = .76$ ), sad, ( $M = .83$ ), and scared music ( $M = .68$ ),  $ps < .92$ , but lower for angry music ( $M = .56$ ),  $ps \leq .001$ . For the inflected speech stimuli, participants scored similarly for happy speech ( $M = .77$ ), sad speech ( $M = .72$ ), and angry speech ( $M = .75$ ),  $ps = 1.00$ . Participants scored significantly lower on scared speech ( $M = .62$ ) than all emotions save angry speech,  $p \leq .04$ . Finally, for the affect burst stimuli, participants scored similarly on all emotions  $ps = 1.00$ .

The emotion by age group interaction was non-significant,  $F(8.09, 288.71) = 1.33$ ,  $p = .227$ ,  $\eta^2_p = .036$ , nor was the three-way interaction of type of stimulus, emotion, and age-group,  $F(14.6, 521.16) = 1.63$ ,  $p = .07$ ,  $\eta^2_p = .04$ .
